# Supplementary figures and images for: 'Artiphysiology' reveals V4-like shape tuning in a deep network trained for image classification
Source: eLife journal article supplement (doi:10.7554/elife.38242), 2018-12-20

**A**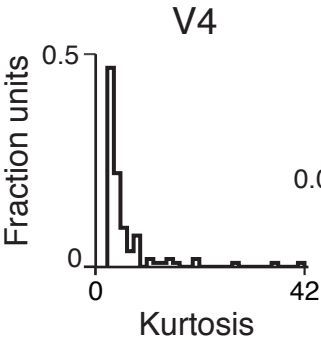**B**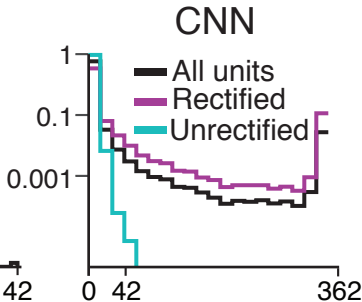

Supplement: supp [file elife_poa_e38242_Figure_4_figure_supplement_1.pdf › elife_poa_e38242_Figure_4_figure_supplement_1.pdf]

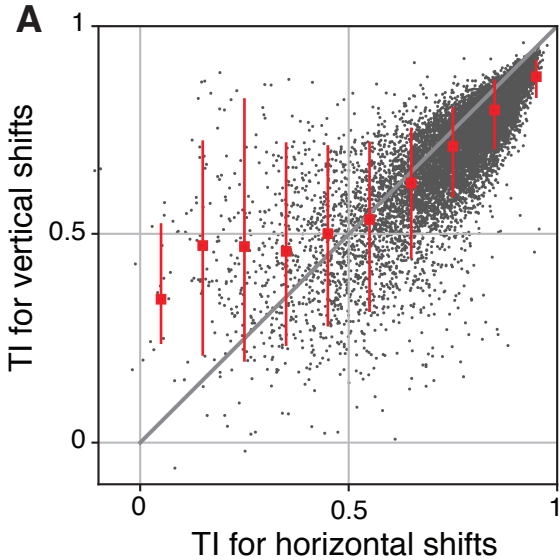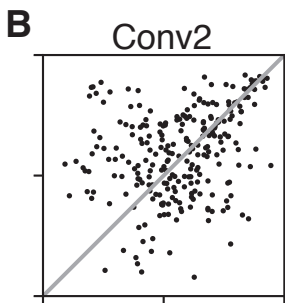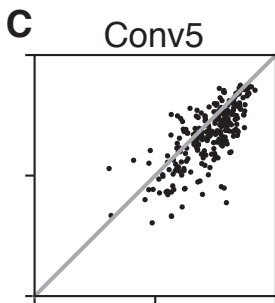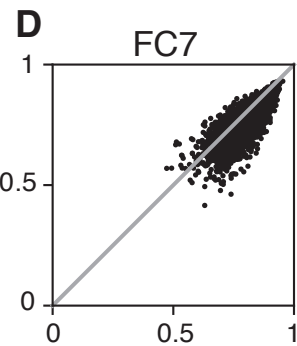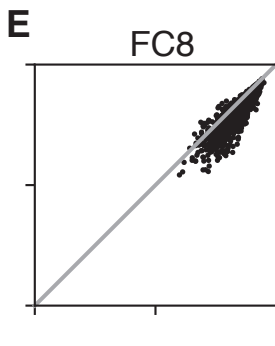

Supplement: supp [file elife_poa_e38242_Figure_7_figure_supplement_1.pdf › elife_poa_e38242_Figure_7_figure_supplement_1.pdf]
